# Supplementary material
Source: Springer Nature journal article supplement (https://www.springermedizin.de/resource/supplementary/12968_2011_1991_MOESM3_ESM.pdf/9581086)

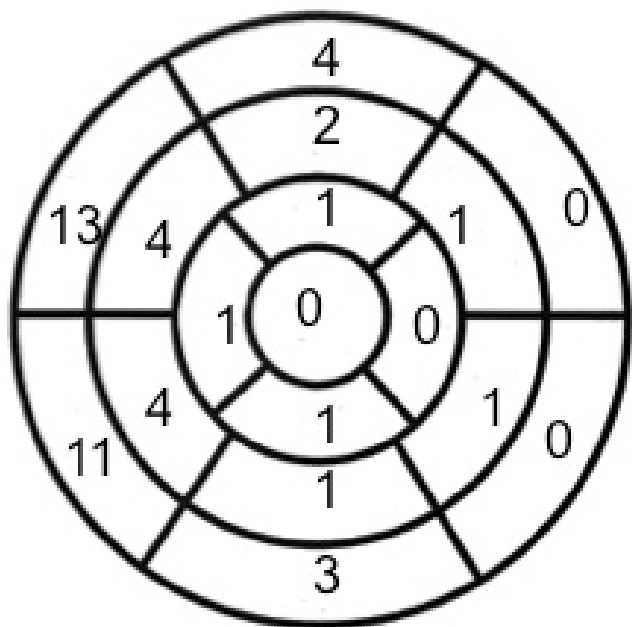

a

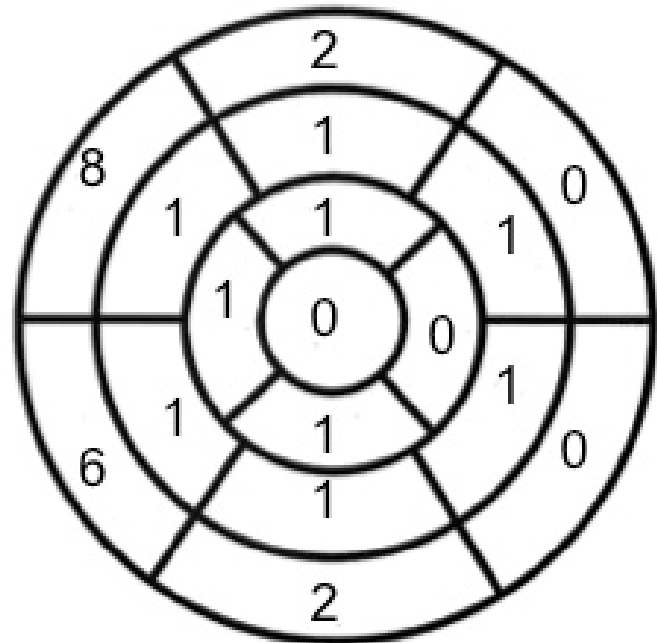

b

Supplement: MOESM3 [file 9581086]
